# Supplementary material for: Higher pNRF2, SOCS3, IRF3, and RIG1 Tissue Protein Expression in NASH Patients versus NAFL Patients: pNRF2 Expression Is Concomitantly Associated with Elevated Fasting Glucose Levels
Source: MDPI journal article supplement (doi:10.3390/jpm13071152), 2023-07-18
Supplement: s1 [file s1]

## Supplementary Table S1

### Immunohistochemistry antibodies and staining protocols

| Antibody                    | Company        | Clonality | HIER                       | Dilution  | Incubation | Detection              | Company | Incubation | DAB     | Hematoxylin |
|-----------------------------|----------------|-----------|----------------------------|-----------|------------|------------------------|---------|------------|---------|-------------|
| <b>Vimentin</b>             | Dako           | Ms. mono. | pH 9.0; 20 min.<br>WB 96°C | /500      | 60min. RT  | ZytoChem Plus<br>AP    | Zytomed | Kit        | 2x5min. | 5min.       |
| <b>Active<br/>Caspase 3</b> | Cell Signaling | Rb. poly  | pH 9.0; 20 min.<br>WB 96°C | /50       | 60min. RT  | ZytoChem Plus<br>AP    | Zytomed | Kit        | 2x5min. | 5min.       |
| <b>KI67</b>                 | Roche Ventana  | Rb. mono. | pH 9.0; 20 min.<br>WB 96°C | undiluted | 60min. RT  | ZytoChem Plus<br>AP    | Zytomed | Kit        | 2x5min. | 5min.       |
| <b>IRF3</b>                 | Invitrogen     | Rb. poly  | pH 9.0; 20 min.<br>WB 96°C | /50       | 30min. RT  | Polyview Plus<br>AP Rb | Enzo    |            | 2x5min. | 5min.       |
| <b>RIG1</b>                 | Invitrogen     | Rb. poly  | pH 9.0; 20 min.<br>WB 96°C | /200      | 30min. RT  | Polyview Plus<br>AP Rb | Enzo    |            | 2x5min. | 5min.       |
| <b>M30</b>                  | TecoMedical    | Ms. mono. | pH 9.0; 20 min.<br>WB 96°C | /4500     | 30min. RT  | ZytoChem Plus<br>AP    | Zytomed | Kit        | 2x5min. | 5min.       |
| <b>pSTAT3</b>               | Cell Signaling | Rb. mono. | pH 9.0; 20 min.<br>WB 96°C | /50       | 60min. RT  | ZytoChem Plus<br>AP    | Zytomed | Kit        | 2x5min. | 5min.       |
| <b>pNRF2</b>                | Novus          | Rb. mono. | pH 9.0; 40 min.<br>WB 96°C | /25       | 60min. RT  | Polyview Plus<br>AP Rb | Enzo    |            | 2x5min. | 5min.       |
| <b>Syntaxin</b>             | Sigma          | Rb. poly  | pH 9.0; 20 min.<br>WB 96°C | /200      | 60min. RT  | ZytoChem Plus<br>AP    | Zytomed | Kit        | 2x5min. | 5min.       |
| <b>SGLT2</b>                | Novus          | Rb. poly  | pH 9.0; 20 min.<br>WB 96°C | /50       | 30min. RT  | ZytoChem Plus<br>AP    | Zytomed | Kit        | 2x5min. | 5min.       |
| <b>SOCS3</b>                | Abcam          | Rb. mono. | pH 9.0; 20 min.<br>WB 96°C | /100      | 30min. RT  | ZytoChem Plus<br>AP    | Zytomed | Kit        | 2x5min. | 5min.       |

### Figure Legends

**Supplementary Table S1: Antibodies and staining protocols are shown in detail.**

**From each FFPE tissue 1-to-2 µm-thick sections**

were cut, dewaxed and pre-treated for further processing in an automated staining device (Dako Autostainer, Dako Glostrup, Denmark).

**Abbreviations: Rb: rabbit; Ms: mouse; Gt: goat; poly: polyclonal; DAB: 3,3'-diaminobenzidine ; pSTAT3: Phospho STAT3 ;**

pNRF2: Phospho NRF2; mono: monoclonal; WB: water bath; HIER: heat-induced epitope retrieval.

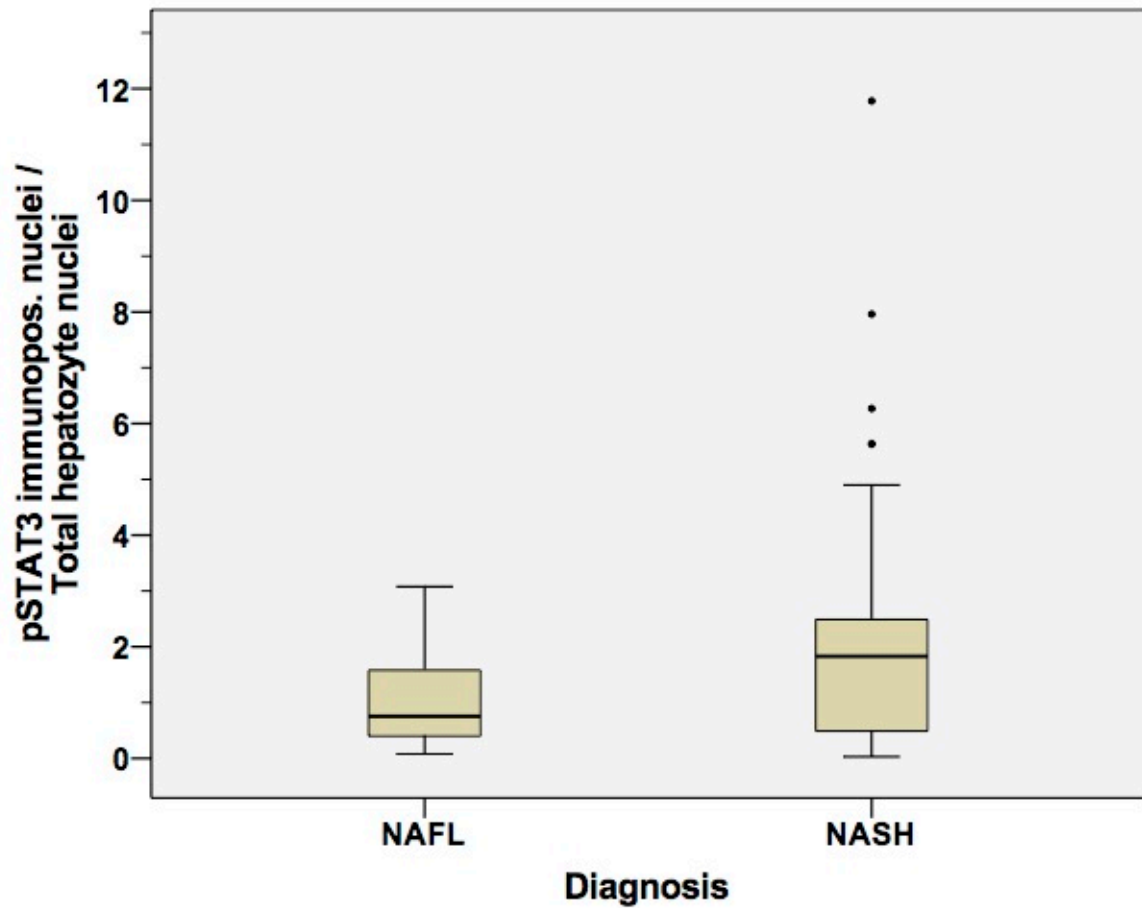

**Supplementary Figure S1.** Nuclear pSTAT3 immunostaining shows a trend toward higher values in NASH than in NAFL;  $p = 0.059$ .
